# Supplementary material for: ψ-Bufarenogin, a novel anti-tumor compound, suppresses liver cancer growth by inhibiting receptor tyrosine kinase-mediated signaling
Source: PubMed Central journal article supplement (PMC4484481; doi:10.18632/oncotarget.3435), 2015-03-23
Supplement: oncotarget-06-11627-s001.pdf [file oncotarget-06-11627-s001.pdf]

## SUPPLEMENTARY FIGURES AND TABLES

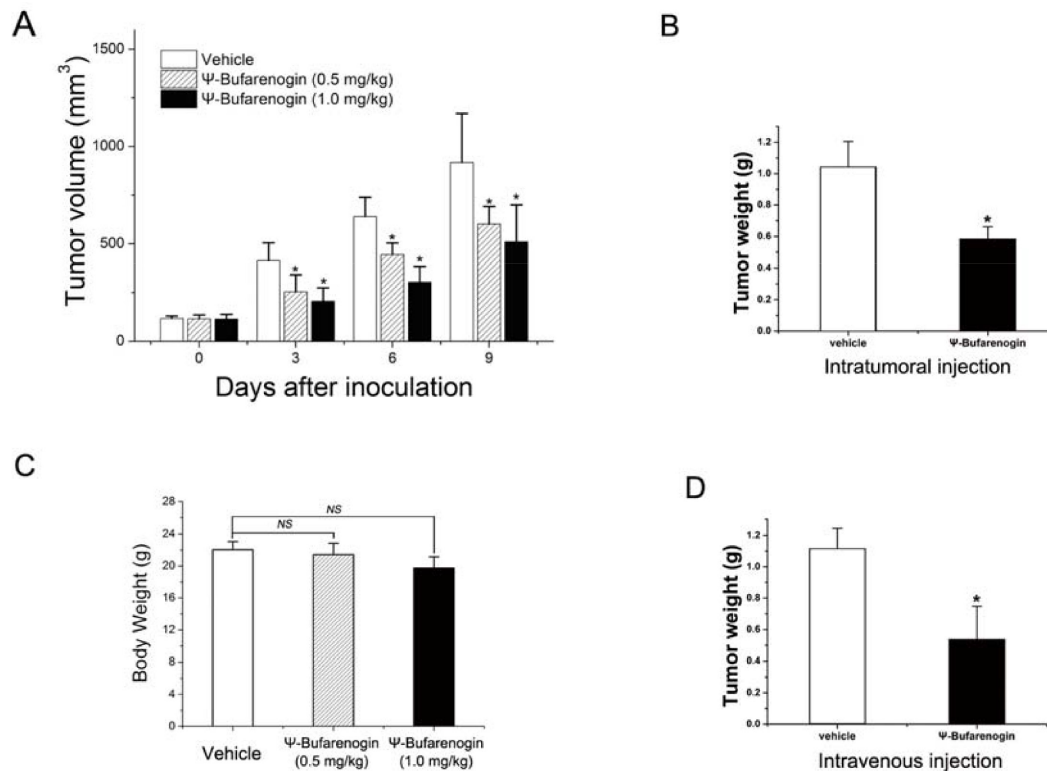

**Supplementary Figure S1:** (A) SMMC-7721 cells-derived xenografts were implanted s.c. in the flanks of nude mice followed by the intratumor injection of  $\psi$ -Bufarenogin. Tumor volume was measured by caliper. Data are represented as mean  $\pm$  SEM. \**p* < 0.05. (B) SMMC-7721 cells-derived xenograft was transplanted s.c. into the flank of nude mice followed by intratumor injection of  $\psi$ -Bufarenogin. Xenograft tumors were resected and weighted after  $\psi$ -Bufarenogin treatment. Data are represented as mean  $\pm$  SEM. \**p* < 0.05. (C) The body weights of the nude mice were measured after intratumor  $\psi$ -Bufarenogin administration. Data are represented as mean  $\pm$  SEM. (D) SMMC-7721 cells-derived xenograft was transplanted s.c. into the flank of nude mice followed by i.v. administration of  $\psi$ -Bufarenogin. Xenograft tumors were resected and weighted after  $\psi$ -Bufarenogin treatment. \**p* < 0.05. Data are represented as mean  $\pm$  SEM.

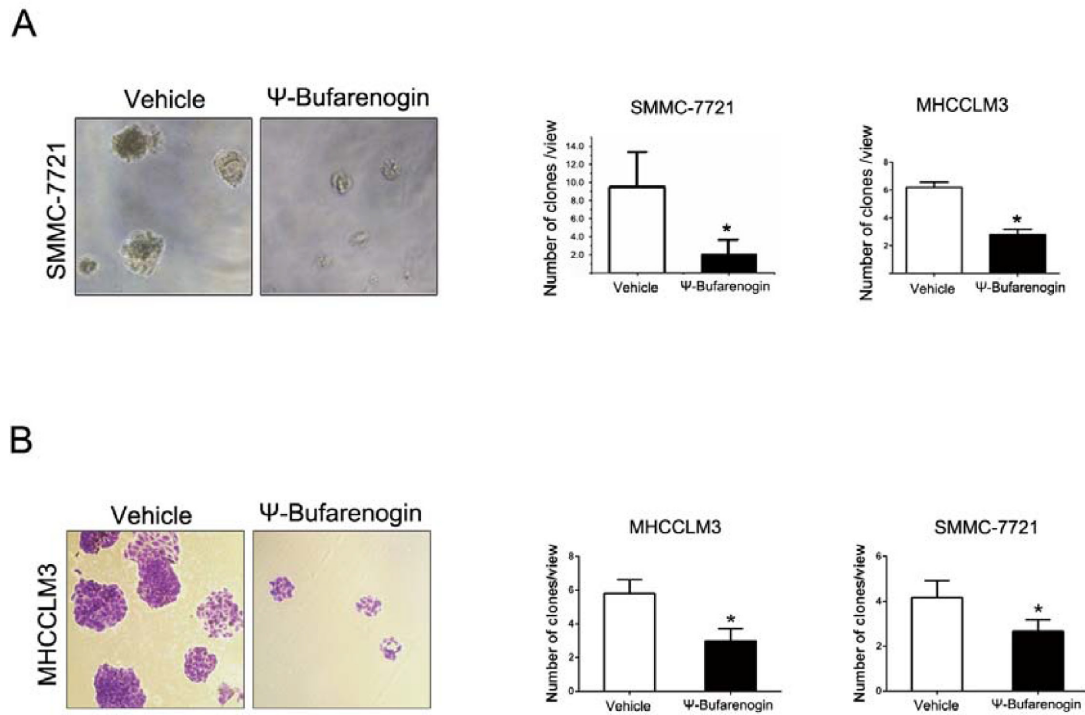

**Supplementary Figure S2:** (A) The anchor-independent growth of hepatoma cells exposed to  $\Psi$ -Bufarenogin in matrigel were counted and compared. Data are represented as mean  $\pm$  SEM. \* $p < 0.05$ . (B) Colony formation in hepatoma cells treated with  $\Psi$ -Bufarenogin on culture plates was measured after crystal violet staining. Data are represented as mean  $\pm$  SEM. \* $p < 0.05$ .

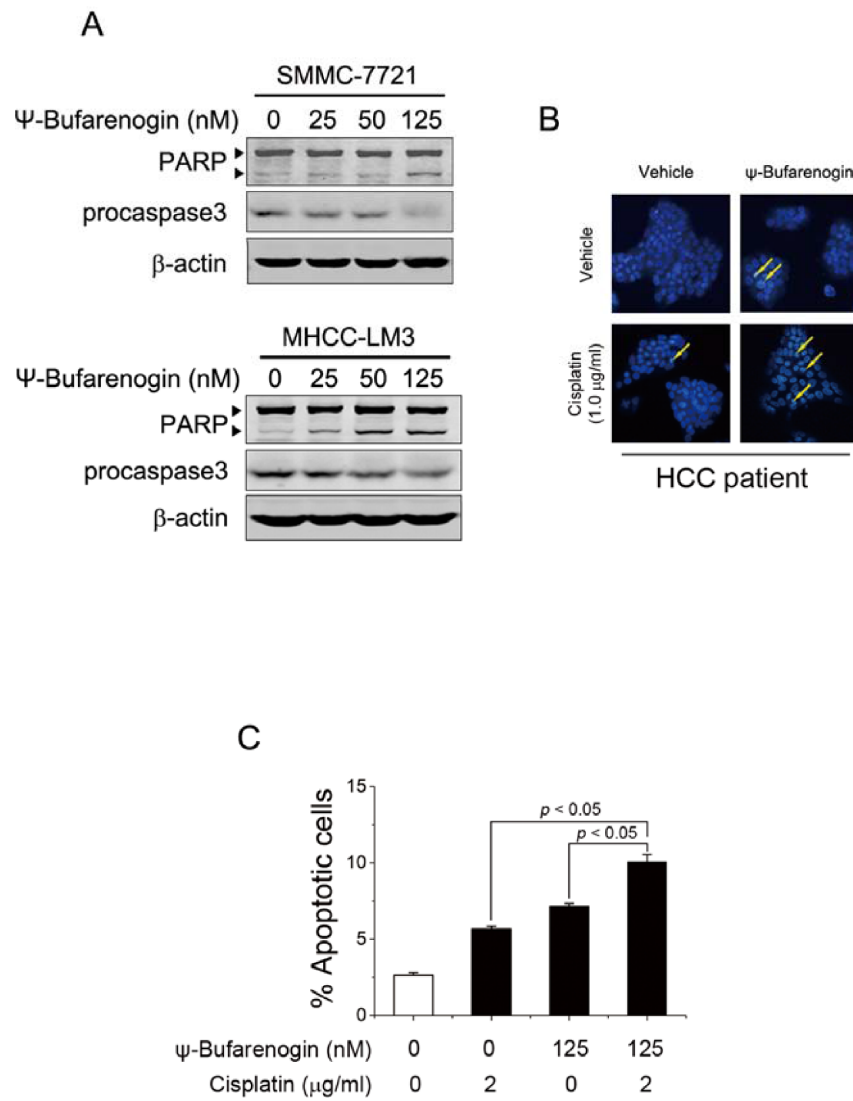

**Supplementary Figure S3:** (A) Western blot analysis of hepatoma cells treated with Ψ-Bufarenogin for 48 hours. (B) Primary cultured hepatoma cells from fresh patient HCC tissues were treated with Ψ-Bufarenogin and/or cisplatin as indicated. The cells were fixed with 4% polyformaldehyde and stained with PI. The yellow arrows indicate apoptotic cells. (C) Primary cultured hepatoma cells were treated with Ψ-Bufarenogin and/or cisplatin for 48 hours. Apoptotic cells were measured by FACS. Data are represented as mean ± SEM.

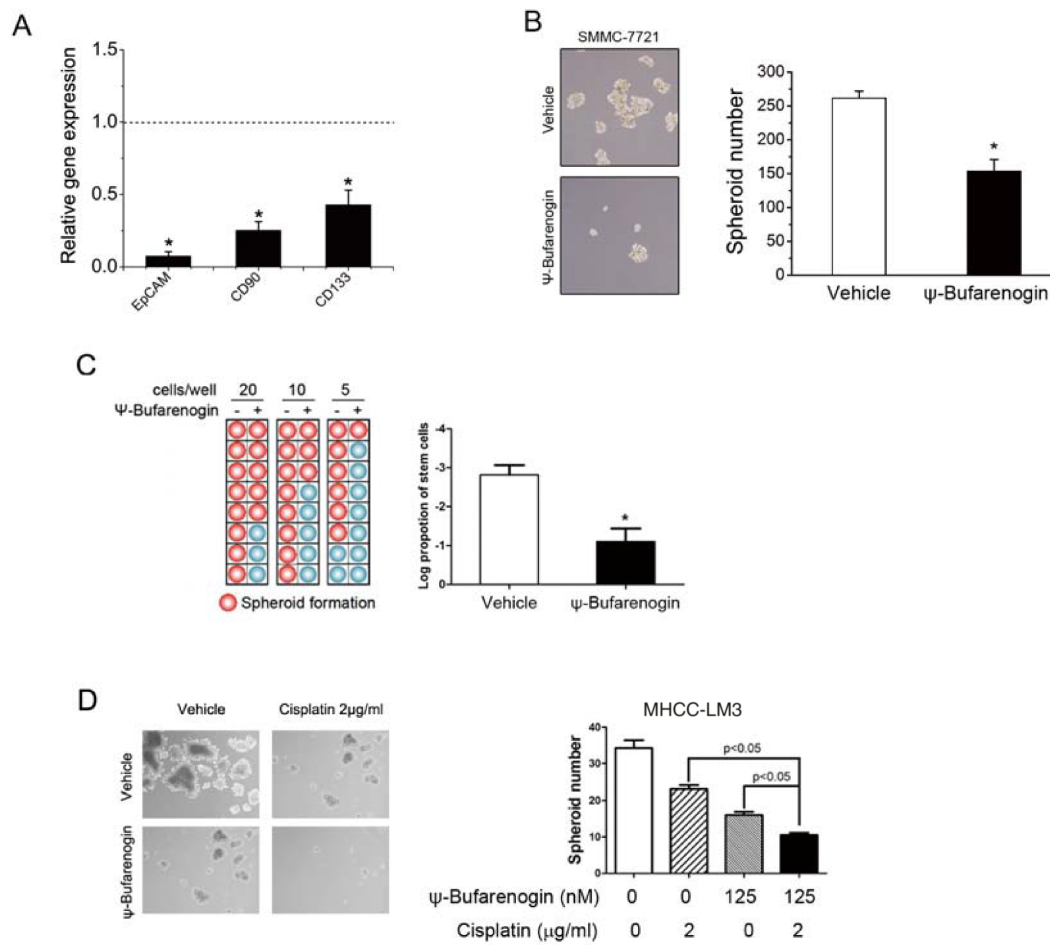

**Supplementary Figure S4:** (A) Relative expression levels of EpCAM, CD90 and CD133 in  $\psi$ -Bufarenogin-treated SMMC-7721 cells compared with control cells were analyzed by real-time PCR. Data are represented as mean  $\pm$  SEM. (B) Spheroid formation assay of SMMC-7721 cells exposed to 50 nM  $\psi$ -Bufarenogin or vehicle control. Data are represented as mean  $\pm$  SEM. \* $p$  < 0.05. (C) Limiting dilution assay of MHCC-LM3 cells exposed to  $\psi$ -Bufarenogin (50 nM), and the estimated proportion of cancer stem cells was shown as its natural logarithm. The red balls represent wells with spheroid formations. Data are represented as mean  $\pm$  SEM. \* $p$  < 0.05. (D) Spheroid formation assay of hepatoma cells treated with  $\psi$ -Bufarenogin and/or cisplatin. Data are represented as mean  $\pm$  SEM. \* $p$  < 0.05.

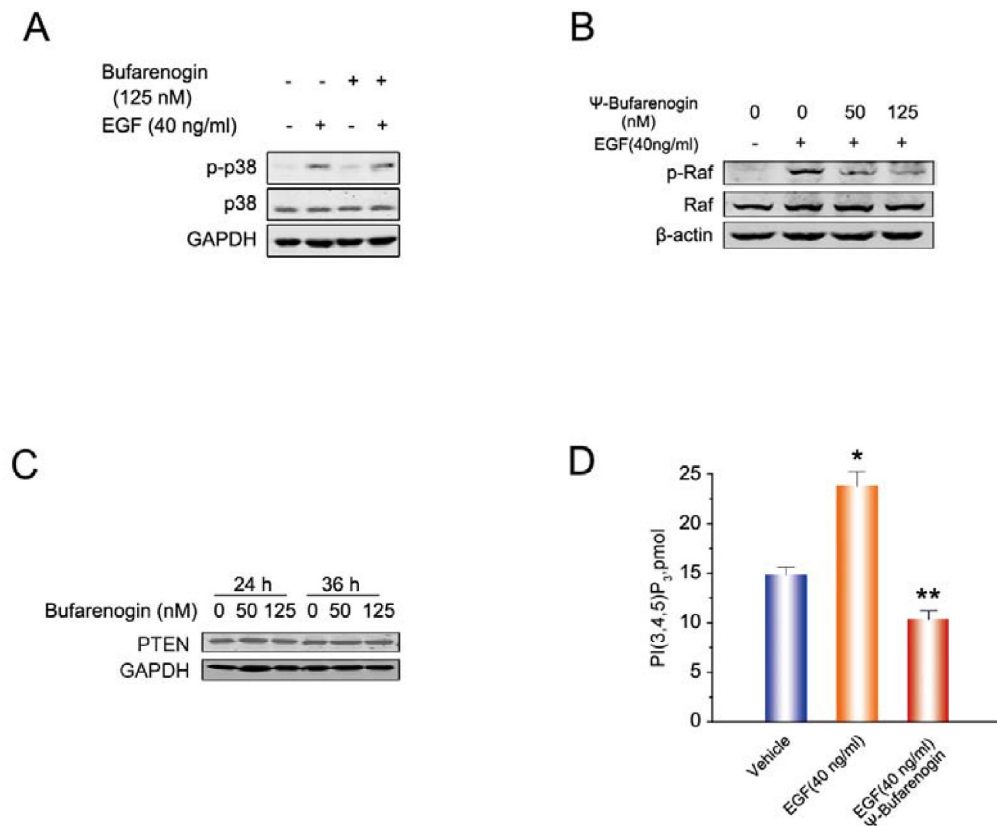

**Supplementary Figure S5:** (A&B) SMMC-7721 cells were pretreated with ψ-Bufarenogin for 4h and exposed to EGF for 15 min followed by western blot assay. (C) SMMC-7721 cells were exposed to ψ-Bufarenogin as indicated followed by western blot assay. (D) SMMC-7721 cells pretreated with ψ-Bufarenogin were exposed to EGF. Activation of PI3-K was measured by kinase activity assay. Data are represented as mean ± SEM. \* $p < 0.05$ .

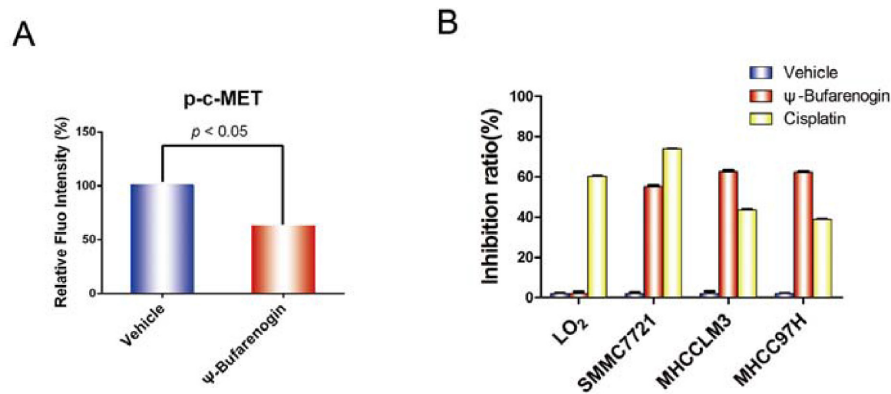

**Supplementary Figure S6:** (A) The effect of ψ-Bufarenogin on c-MET phosphorylation was determined by WideScreen™ RTK pTyr Assay (Merck, Inc.). (B) CCK8 assay of LO2 normal hepatocytes and HCC cells treated with ψ-Bufarenogin (25 nM) and cisplatin (1 μg/ml). The inhibition ratio was calculated as described above. Data are represented as mean ± SEM.

A

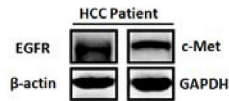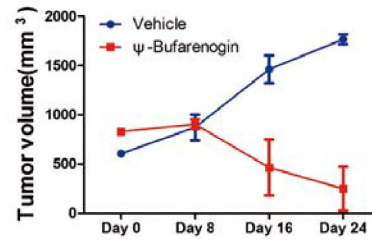

B

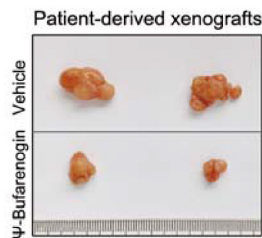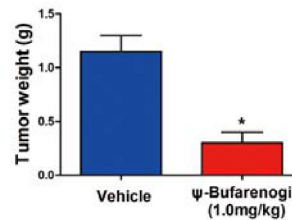

**Supplementary Figure S7:** (A) Western blot was performed to determine the expression of EGFR and c-MET in HCC patient-derived xenograft. Patient-derived xenograft was then transplanted s.c. into the flank of nude mice followed by intratumor injection (1 mg/kg) of ψ-Bufarenogin for 24 days. Tumor volume was measured as described above. (B) Xenograft tumors were resected and weighted after ψ-Bufarenogin treatment. Data are represented as mean ± SEM. \**p* < 0.05.

**Supplementary Table S1: The function index of liver and kidney of mice (Mean ± SD)**

| Group                   | TP(IU/L)     | ALB(IU/L)    | GLB(IU/L)    | A/G(IU/L)     | ALT(IU/L)    | AST(IU/L)      | BUN(IU/L)    | Cr(IU/L)     |
|-------------------------|--------------|--------------|--------------|---------------|--------------|----------------|--------------|--------------|
| vehicle                 | 60.96 ± 2.08 | 31.56 ± 1.51 | 30.00 ± 2.00 | 1.08 ± 0.109  | 71.35 ± 5.96 | 562.08 ± 33.96 | 9.00 ± 0.20  | 14.66 ± 1.15 |
| Bufarenogin (0.2 mg/kg) | 61 ± 3.38    | 33.6 ± 1.64  | 27 ± 2.58    | 1.275 ± 0.095 | 58.13 ± 7.53 | 561.33 ± 76.87 | 10.48 ± 0.87 | 21.5 ± 1.00  |

**Supplementary Table S2: Sequence of primers for real-time PCR**

| Primer                    | Sequence (5'to3')         |
|---------------------------|---------------------------|
| Cyclin A1 forward primer  | GTCAGAGAGGGGATGGCAT       |
| Cyclin A1 reverse primer  | CCAGTCCACCAGAATCGTG       |
| Cyclin B1 forward primer  | AAGAGCTTTAAACTTTGGTCTGGG  |
| Cyclin B1 reverse primer  | CTTTGTAAGTCCTTGATTTACCATG |
| Cyclin D1 forward primer  | GCGCGCCCTCCGTTTCTTACTT    |
| Cyclin D1 reverse primer  | AGCTGCAGGCGGCTCTTCTT      |
| Cyclin E1 forward primer  | ATACAGACCCACAGAGACAG      |
| Cyclin E1 reverse primer  | TGCCATCCACAGAAATACTT      |
| EpCAM forward primer      | TCGCGTTCGGGCTTCTGCTT      |
| EpCAM reverse primer      | GGGCCCTTCAGGTTTTGCT       |
| CD 90 forward primer      | CGGAAGACCCCAGTCCA         |
| CD 90 reverse primer      | ACGAAGGCTCTGGTCCACTA      |
| CD133 forward primer      | GCAGCAGTCTGACCAGCGTGAA    |
| CD133 reverse primer      | ACGGGTGGAAGCTGCCTCAGTT    |
| Sox2 forward primer       | AAATGGGAGGGGTGCAAAAGAGGAG |
| Sox2 reverse primer       | CAGCTGTCATTTGCTGTGGGTGATG |
| Oct4 forward primer       | CTTGCTGCAGAAGTGGGTGGAGGAA |
| Oct4 reverse primer       | CTGCAGTGTGGGTTTCGGGCA     |
| Nanog forward primer      | AATACCTCAGCCTCCAGCAGATG   |
| Nanog reverse primer      | TGCGTCACACCATTGCTATTCTTC  |
| Bmi1 forward primer       | TGGAGAAGGAATGGTCCACTTC    |
| Bmi1 reverse primer       | GTGAGGAAACTGTGGATGAGGA    |
| Klf4 forward primer       | CCCACACAGGTGAGAAACCT      |
| Klf4 reverse primer       | ATGTGTAAGGCGAGGTGGTC      |
| VEGF forward primer       | CCTTGCTGCTCTACCTCCAC      |
| VEGF reverse primer       | ATCTGCATGGTGATGTTGGA      |
| Beta-actin forward primer | AATCGTGCGTGACATTAAGGAG    |
| Beta-actin reverse primer | ACTGTGTTGGCGTACAGGTCTT    |

**Supplementary Table S3: Antibodies used for immunoblotting and immunohistochemistry**

| Protein       | Antibody          | Epitope mapping   | Manufacturer                                |
|---------------|-------------------|-------------------|---------------------------------------------|
| cyclin B1     | Mouse monoclonal  | Full length       | Cell Signaling Technology Inc., Beverly, MA |
| cyclin D1     | Rabbit monoclonal | Full length       | Cell Signaling Technology Inc., Beverly, MA |
| cyclin E      | Mouse monoclonal  | Full length       | Cell Signaling Technology Inc., Beverly, MA |
| PTEN          | Rabbit polyclonal | Full length       | ProteinTech Group, Inc. USA                 |
| Phospho-Akt   | Rabbit monoclonal | Serine 473        | Epitomics, Inc., Burlingame, CA             |
| Akt           | Rabbit polyclonal | C-terminus        | Cell Signaling Technology, Beverly, MA, USA |
| Phospho-ERK   | Rabbit monoclonal | Thr202/Tyr204     | Cell Signaling Technology, Beverly, MA, USA |
| ERK           | Rabbit monoclonal | C-terminus        | Cell Signaling Technology, Beverly, MA, USA |
| GAPDH         | Mouse monoclonal  | Full length       | Kangchen, Shanghai, P.R. China              |
| $\Phi$ -actin | Rabbit polyclonal | C-terminus        | Santa Cruz Biotechnology, Santa Cruz, CA    |
| Phospho-MEK   | Rabbit monoclonal | Ser217/221        | Cell Signaling Technology, Beverly, MA, USA |
| MEK           | Rabbit polyclonal | Full length       | Cell Signaling Technology, Beverly, MA, USA |
| Phospho-JNK   | Rabbit monoclonal | Thr183/Tyr185     | Cell Signaling Technology, Beverly, MA, USA |
| JNK           | Rabbit polyclonal | Full length       | Cell Signaling Technology, Beverly, MA, USA |
| Phospho-STAT3 | Rabbit monoclonal | Tyr705            | Cell Signaling Technology, Beverly, MA, USA |
| STAT3         | Mouse monoclonal  | Full length       | Cell Signaling Technology, Beverly, MA, USA |
| Mcl-1         | Rabbit monoclonal | Full length       | Cell Signaling Technology, Beverly, MA, USA |
| Bax           | Mouse monoclonal  | amino acids 3–16  | Santa Cruz Biotechnology, Inc               |
| Bcl-2         | Mouse monoclonal  | amino acids 1–205 | Santa Cruz Biotechnology, Inc               |
| CD34          | Rabbit monoclonal | C-terminus        | Epitomics, Inc., Burlingame, CA             |
| Sox-2         | Goat polyclonal   | Full length       | Abclonal, Shanghai, P.R. China              |
| Phospho-EGFR  | Rabbit monoclonal | Tyr1068           | Epitomics, Inc., Burlingame, CA             |
| EGFR          | Rabbit monoclonal | Full length       | Epitomics, Inc., Burlingame, CA             |
| Phospho-c-MET | Rabbit polyclonal | Tyr1234           | Sangon, Shanghai, P.R. China                |
| c-MET         | Rabbit polyclonal | Full length       | Sangon, Shanghai, P.R. China                |
